# Supplementary material for: Spectroscopic Approaches for Structural Analysis of Extracted Chitosan Generated from Chitin Deacetylated for Escalated Periods
Source: Research Square preprint supplement (doi:10.21203/rs.3.rs-5723322/v1), 2025-04-01
Supplement: Supplementary file 1 [file de6b62112e8a3ec1b0545894.docx]

Table (1): The acetylation (DA %) deacetylation (DD %) percentages andmolecular weight (MWT) of commercial and various extracted chitosans acquired from subsequent chitin deacetylation for increasing periods

| Deacetylation time, hour | 22 | 30 | 36 | 40 | CHC*** |
| --- | --- | --- | --- | --- | --- |
| DA*, % | 20.46 | 21.77 | 25.19 | 23.44 | 23.89 |
| DD**, % | 79.54 | 78.23 | 74.81 | 76.56 | 76.11 |
| MWT****, g/mol | 15280 | 14957 | 13349 | 14421 | 41300 |

**acetylation, %; **deacetylation%; ***analyzed as purchased*

*****MWT: molecular weight*

Table (2): Atomic and mass percentages of shrimp shell, extracted chitin, commercial and deacetylated chitosan based on EDX analysis

| Element | Mass, % | | | | Atomic, % | | | |
| --- | --- | --- | --- | --- | --- | --- | --- | --- |
| SS | CT | CHC | CH | SS | CT | CHC | CH |
| C | 27.28 | 44.9 | 37.65 | 33.9 | 36.54 | 55.19 | 45.09 | 41.22 |
| O | 56.33 | 45.55 | 60.32 | 63.29 | 56.65 | 42.04 | 54.23 | 57.77 |
| Na | 0.58 | 0.06 | N.D. | 0.01 | 0.4 | 0.04 | N.D. | 0 |
| Mg | 1.01 | 0.39 | 0.27 | 0.46 | 0.67 | 0.24 | 0.16 | 0.28 |
| P | 1.84 | 0.78 | 0.18 | 0.66 | 0.95 | 0.37 | 0.08 | 0.31 |
| K | 0.18 | 0.56 | 0.17 | 0.07 | 0.07 | 0.21 | 0.06 | 0.03 |
| Ca | 9.68 | 0.4 | 0.27 | 0.14 | 3.89 | 0.15 | 0.10 | 0.05 |
| Mn | 0.38 | 0.83 | 0.23 | 0.1 | 0.11 | 0.22 | 0.06 | 0.03 |
| Fe | 0.28 | 0.66 | 0.20 | 0.09 | 0.08 | 0.17 | 0.05 | 0.02 |
| Ni | 0.54 | 1.08 | 0.30 | 0.17 | 0.15 | 0.27 | 0.07 | 0.04 |
| Cu | 1.28 | 2.57 | 0.21 | 0.56 | 0.32 | 0.6 | 0.05 | 0.13 |
| Zn | 0.63 | 2.24 | 0.21 | 0.56 | 0.73 | 0.51 | 0.05 | 0.12 |

*SS: shrimp shell – CT: chitin- CHC: commercial chitosan -*

*CH: extracted chitosan after deacetylation for 30 hrs- ND: not detected*

Table (3): UV–Vis absorbance peak’s assignments and character for extracted chitosan acquired due to deacetylation of chitin for 22 hrs, 30 hrs, 36 hrs, 40 hrs and commercial chitosan

| Stuff | Absorbance, nm | Peak’s character | |
| --- | --- | --- | --- |
| CH22 | 238 | strong | sharp |
| 289 | shoulder |  |
| CH30 | 245 | medium | sharp |
| 290 | shoulder |  |
| CH36 | 242 | medium | sharp |
| 290 | shoulder |  |
| CH40 | 242 | medium | sharp |
| 292 | medium | broad |
| 346 | medium | broad |
| CHC | 248 | weak | broad |

Table (4): Thermal analyses data for commercial and the acquired extracted chitosan as a function of increasing the deacetylation periods

| Deacetylation period, (hours) | Peak array | Temperature, of degradation peaks, (°C) | | | Mass loss at maximum, (%) | Total mass loss, (%) |
| --- | --- | --- | --- | --- | --- | --- |
| On set | Maximum | Off set |
| Commercial* | first | 48.10 | 87.24 | 131.80 | 7.09 | 52.50 |
| second | 278.83 | 305.26 | 323.87 | 33.17 |
| 22 | first | 44.57 | 82.54 | 121.03 | 8.73 | 52.00 |
| second | 268.03 | 300.20 | 32.07 | 32.07 |
| 30 | first | 44.86 | 80.92 | 105.10 | 5.88 | 37.50 |
| second | 265.77 | 303.40 | 325.92 | 29.86 |
| third | 436.29 | 476.32 | 496.74 | 22.00 |
| 36 | first | 43.52 | 89.30 | 132.32 | 8.61 | 41.00 |
| second | 285.83 | 313.34 | 330.56 | 23.12 |
| 40 | first | 40.85 | 79.67 | 147.86 | 5.61 | 36.32 |
| second | 282.94 | 310.65 | 329.89 | 15.17 |

**commercial chitosan applied without any treatment*
